# Supplementary material
Source: PubMed Central journal article supplement (PMC7780149)
Supplement: EMBJ-40-e105164-s001.pdf [file EMBJ-40-e105164-s001.pdf]

## Table of Contents Appendix Figures and Tables:

### Appendix Figures:

|                         |   |
|-------------------------|---|
| Appendix Figure S1..... | 2 |
| Appendix Figure S2..... | 3 |
| Appendix Figure S3..... | 4 |
| Appendix Figure S4..... | 5 |
| Appendix Figure S5..... | 6 |
| Appendix Figure S6..... | 7 |

### Appendix Tables:

|                        |   |
|------------------------|---|
| Appendix Table S1..... | 8 |
| Appendix Table S2..... | 9 |

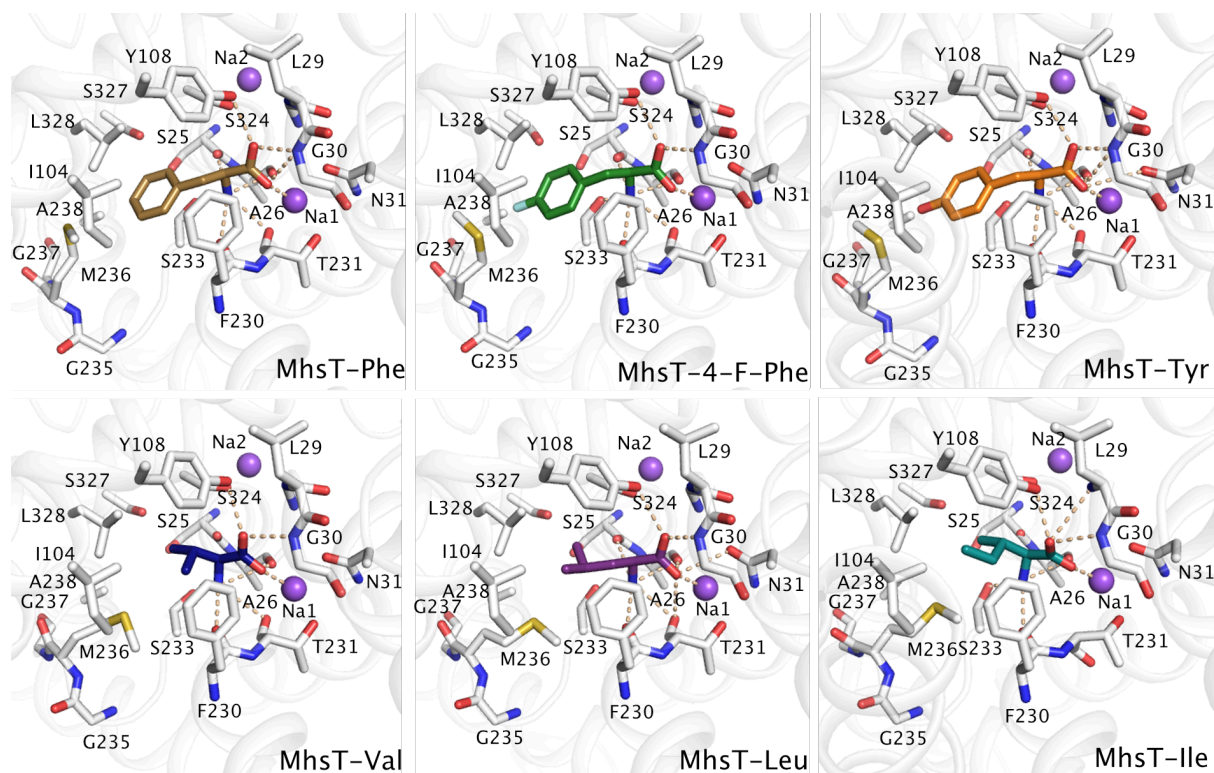

**Appendix Figure S1:** Comparison of the ligand binding sites of MhsT in complex with the various substrates: L-Phe, L-4F-Phe (Tyr analogue), L-Tyr, L-Val, L-Leu and L-Ile. Protein is shown as white ribbon with the binding site defined with white sticks. Substrates are visualised as coloured sticks and the sodium ions as purple spheres. Hydrogen bonds and electrostatic interactions are identified by dashed lines.

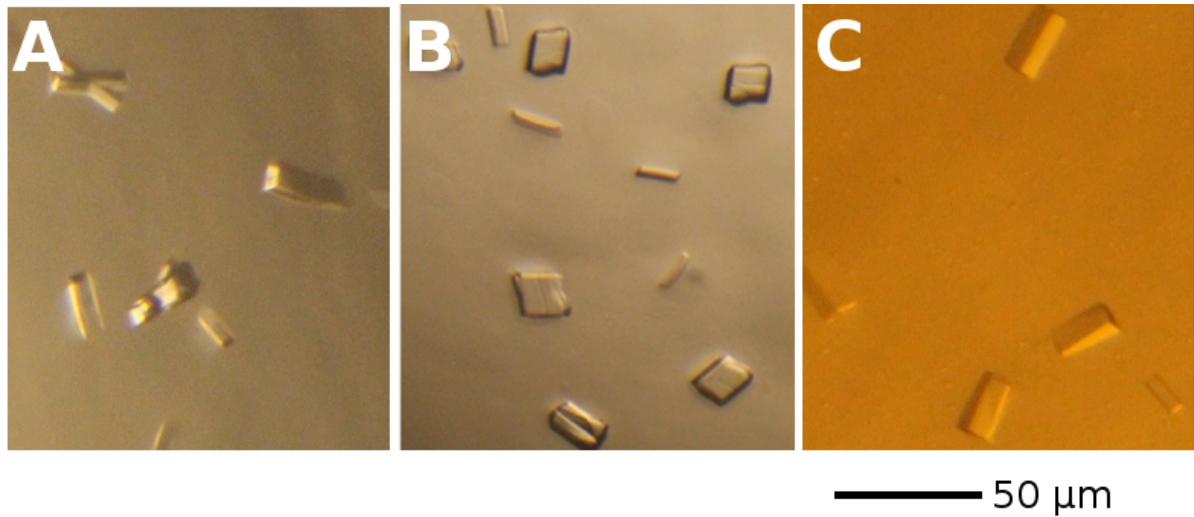

**Appendix Figure S2:** Examples of MhsT crystals obtained in complexes with different substrates. A) MhsT+Leu complex obtained using HiLiDe in hanging drop plates, 0.5 mM L-Leu, 0.1 M HEPES-NaOH pH 7.0, 16 % PEG 400, 0.4 M NaCl, 2x cmc OTG, 10 % glycerol; B) MhsT+4-F-Phe complex obtained using HiLiDe in hanging drop plates, 0.5 mM L-Phe, 0.1 M Tris-HCl pH 7.0, 14 % PEG 400, 0.4 M NaCl, 5 % TMANO, 2x cmc OTG, 5 % glycerol; C) MhsT+Val complex crystals obtained in hanging drop plates with protein:DOPC ration of 3:0.8 (w/w), 2x cmc NG; 5 % glycerol, 12 % PEG400, 0.1M HEPES-NaOH pH 7.0, 0.3 M NaCl, 5 % TMANO.

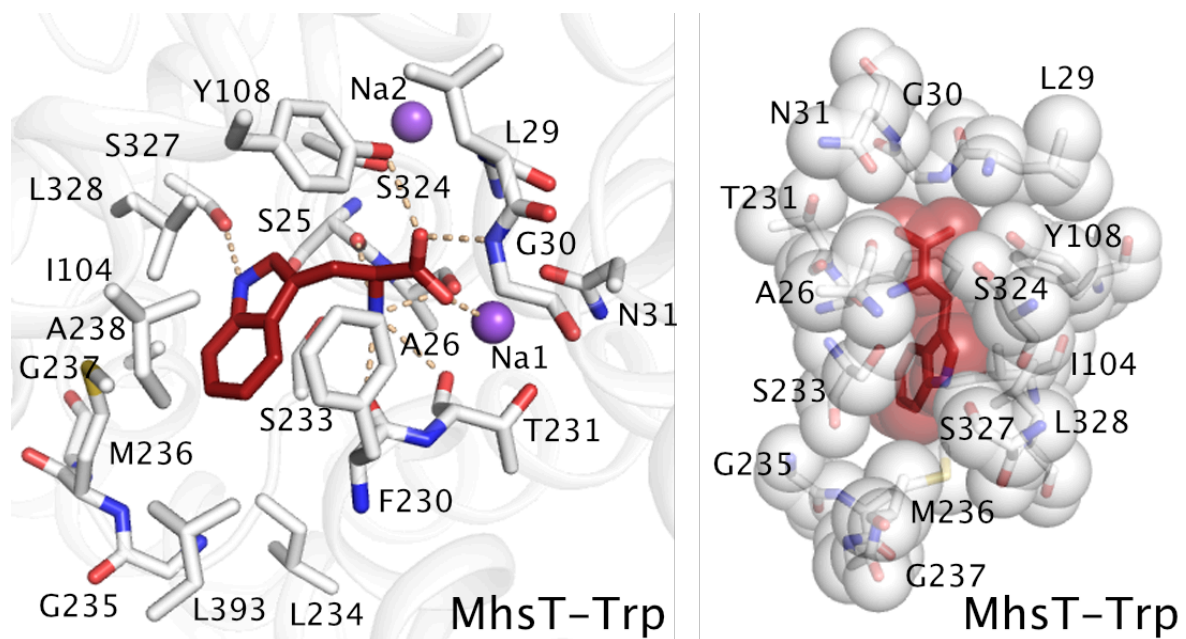

**Appendix Figure S3:** Binding of Trp (PDB ID: 4US3). Ligand binding site of MhsT in complex with L-Trp and volume of the binding pockets visualised by means of the van der Waals representation of the ligand and coordinating residues of MhsT in complex with L-Trp.

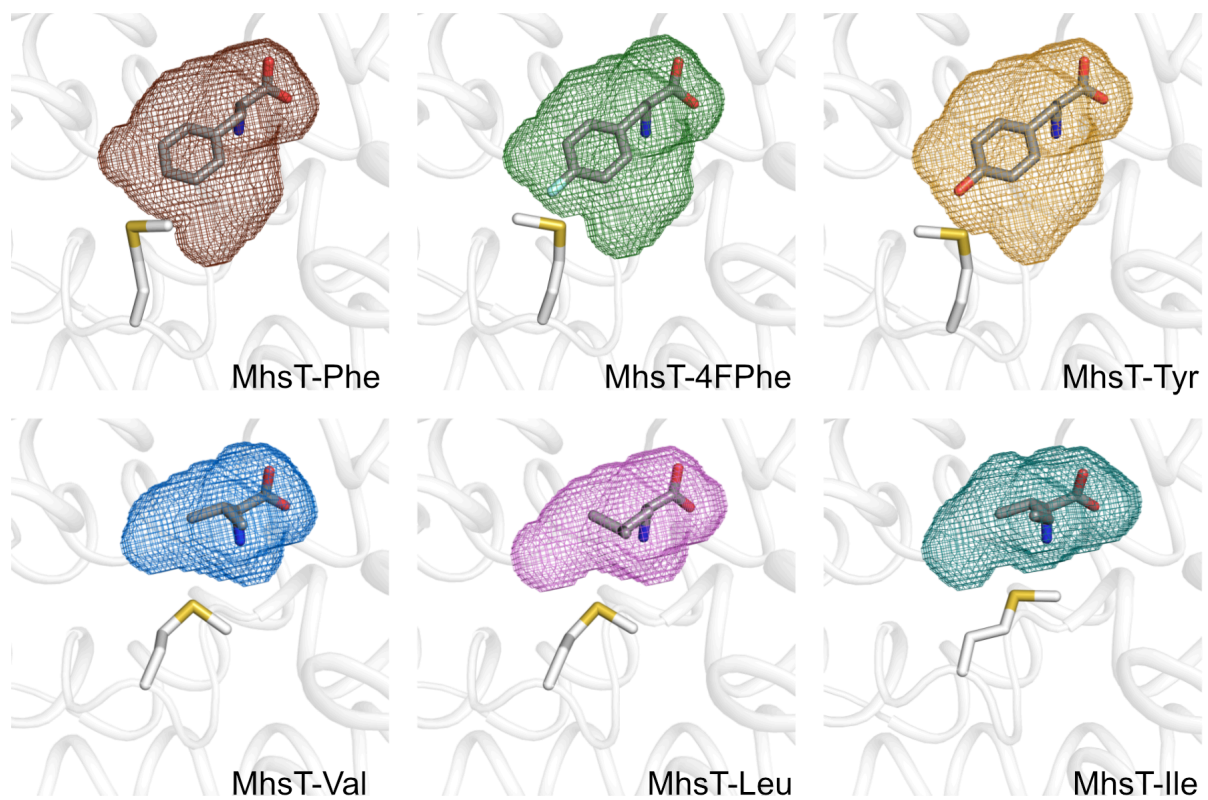

**Appendix Figure S4:** Binding site volumes calculated by use of VOIDOO for MhsT in complex with Phe, 4FPhe, Tyr, Val, Leu and Ile.

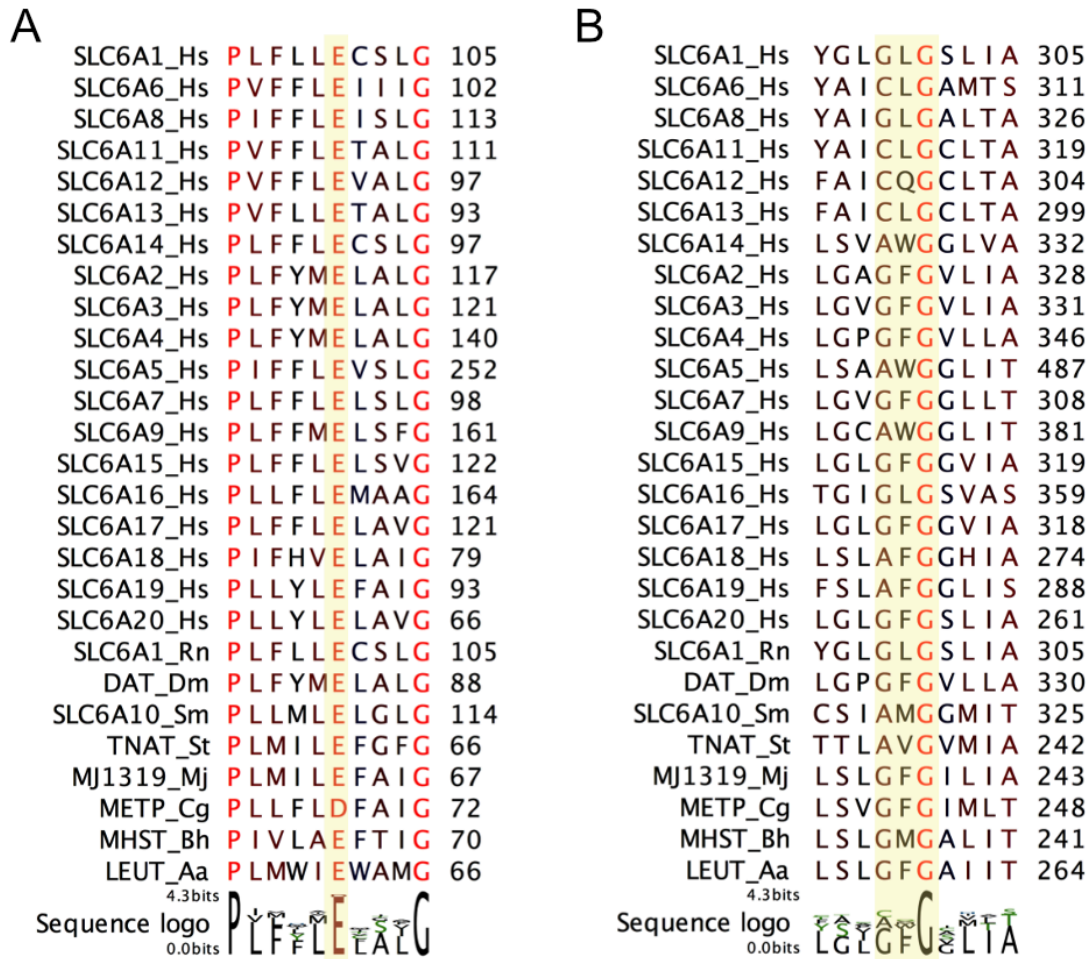

**Appendix Figure S5:** Conservation of the A) Glu66<sup>MhsT</sup> and B) GMG motif within the unwound part of TM6 across the human SLC6 family membranes and their homologues from other organisms. Accession numbers: SLC6A1\_Hs - P30531; SLC6A2\_Hs - P23975; SLC6A3\_Hs - Q01959; SLC6A4\_Hs - P31645; SLC6A5\_Hs - Q9Y345; SLC6A6\_Hs - P31641; SLC6A7\_Hs - Q99884; SLC6A8\_Hs - P48029; SLC6A9\_Hs - P48067; SLC6A11\_Hs - P48066; SLC6A12\_Hs - P48065; SLC6A13 - Q9NSD5; SLC6A14\_Hs - Q9UN76; SLC6A15\_Hs - Q9H2J7; SLC6A16\_Hs - Q9GZN6; SLC6A17\_Hs - Q9H1V8; SLC6A18\_Hs - Q96N87; SLC6A19\_Hs - Q695T7; SLC6A20\_Hs - Q9NP91; SLC6A1\_Rn - P23978; DAT\_Dm - Q7K4Y6; SLC6A10\_Sm - A0A0H3YEX6; TNAT\_St - O50649; MJ1319\_Mj - Q58715; METP\_Cg - A0A0D6FTY1; MhsT - Q9KDT3; LeuT - O67854.

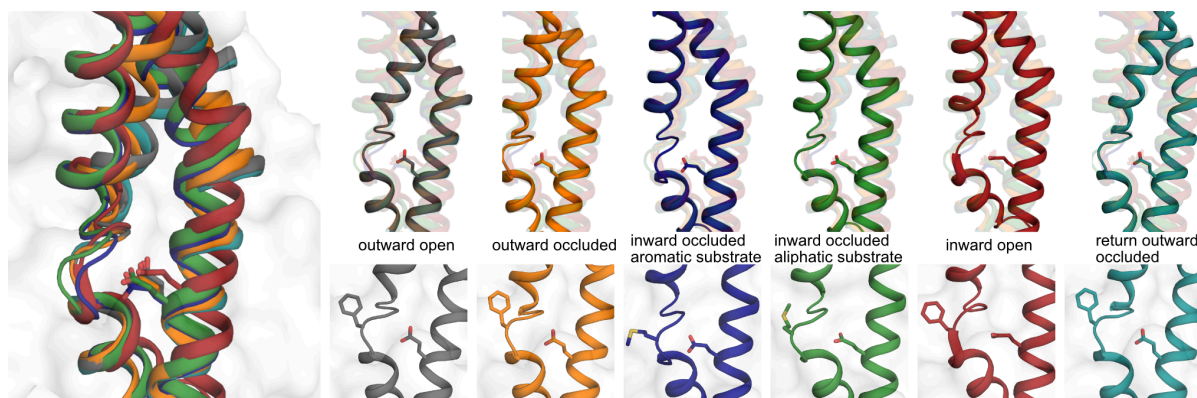

**Appendix Figure S6:** Movement of TM6, TM2 and Glu66 during the transport cycle. Structures are aligned based on scaffold TMs 3-4, and TMs 8-9. LeuT outward open conformation (PDB ID: 3TT1): gray color; LeuT outward-occluded conformation (PDB ID: 2A65) – orange color; MhsT-Val inward-occluded conformation with a small substrate – green color; MhsT- 4FPhe inward-occluded conformation with an aromatic substrate- blue color; LeuT inward-open conformation (PDB ID: 3TT3) – red color; LeuT return-occluded conformation (PDB ID: 5JAE)– cyan color.

**Appendix Table S1:** r.m.s.d. values of the different complexes when compared to MhsT-Trp (PDB ID: 4US3) and comparison of the binding site cavity volumes for the substrate bound MhsT structures.

| <b>Complex</b>    | <b>r.m.s.d. value</b>              | <b>Cavity volume on plot grid (Å<sup>3</sup>)*</b> |
|-------------------|------------------------------------|----------------------------------------------------|
| <b>MhsT-Trp</b>   | n.a.                               | 230                                                |
| <b>MhsT-Tyr</b>   | 0.185                              | 224                                                |
| <b>MhsT-4FPhe</b> | 0.165                              | 215                                                |
| <b>MhsT-Phe</b>   | 0.162                              | 210                                                |
| <b>MhsT-Ile</b>   | Chain A : 0.351<br>Chain B : 0.340 | 159                                                |
| <b>MhsT-Leu</b>   | Chain A : 0.292<br>Chain B : 0.287 | 158                                                |
| <b>MhsT-Val</b>   | Chain A: 0.274<br>Chain B: 0.267   | 144                                                |

\*Calculated with VOIDOO software [65]



**Appendix Table S2:** Comparison of the binding site residues of MhsT, SLC6A18 and SLC6A19.

| <b>MhsT</b> | <b>LeuT</b> | <b>SLC6A18</b> | <b>SLC6A19</b> | <b>dDAT</b> | <b>SERT</b> |
|-------------|-------------|----------------|----------------|-------------|-------------|
| Ala26       | Ala         | Ala            | Cys            | Ala         | Ala         |
| Leu29       | Leu         | Leu            | Leu            | Leu         | Leu         |
| Gly30       | Gly         | Gly            | Gly            | Ala         | Gly         |
| Asn31       | Asn         | Asn            | Asn            | Asn         | Asn         |
| Ile104      | Val         | Ile            | Val            | Ile         | Ile         |
| Tyr108      | Tyr         | Tyr            | Tyr            | Tyr         | Tyr         |
| Phe230      | Phe         | Phe            | Phe            | Phe         | Phe         |
| Thr231      | The         | Ser            | Ser            | Ser         | Ser         |
| Ser233      | Ser         | Ser            | Ser            | Gly         | Gly         |
| Met236      | Phe         | Phe            | Phe            | Phe         | Phe         |
| Ala238      | Ala         | Gly            | Gly            | Val         | Val         |
| Ser324      | Ser         | Thr            | Ser            | Ser         | Ser         |
| Ser327      | Ala         | Gly            | Gly            | Ala         | Gly         |
| Leu328      | Ile         | Thr            | Asn            | Gly         | Gly         |
| Val331      | Pro         | Ala            | Gly            | Gly         | Ala         |
