# Supplementary material
Source: PubMed Central journal article supplement (PMC7780149)
Supplement: EMBJ-40-e105164-s002.pdf [file EMBJ-40-e105164-s002.pdf]

## Expanded View Figures

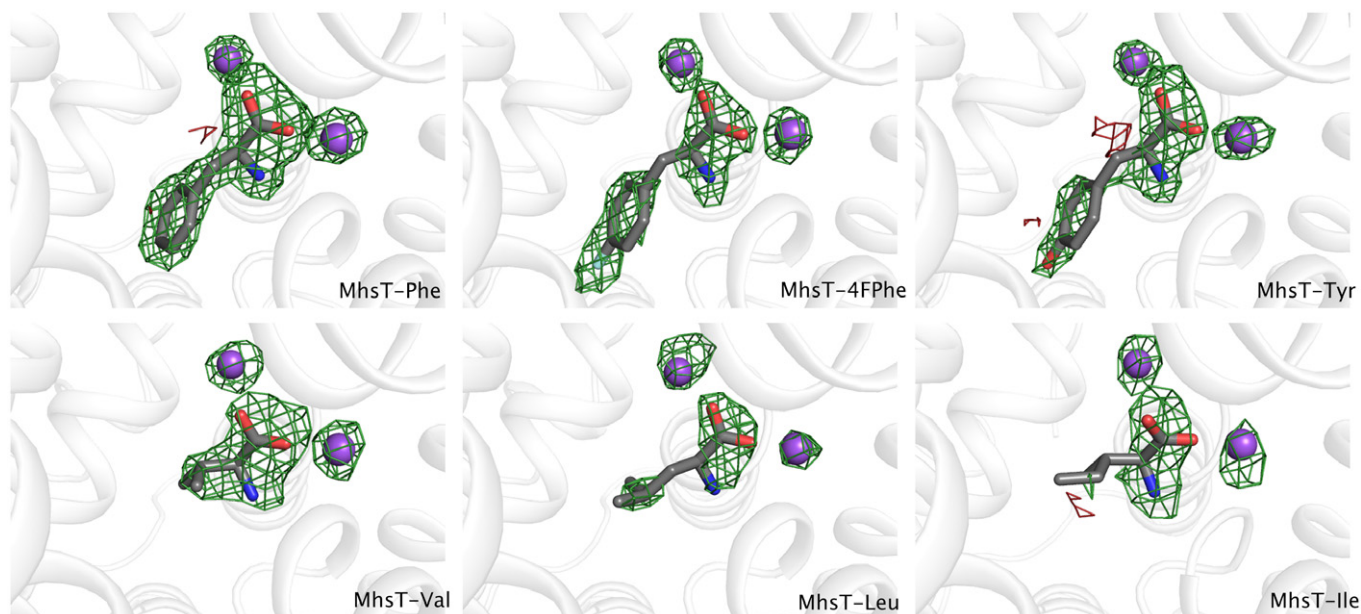

**Figure EV1.**  $F_0-F_c$  simulated annealing omit maps of the MhsT substrates.

$F_0-F_c$  simulated annealing omit maps for MhsT in complex with L-Phe, L-4-F-Phe, L-Tyr, and L-Val contoured at  $\pm 3.0$  r.m.s.d. Omit maps for MhsT in complex with L-Leu and L-Ile contoured at  $\pm 2.5$  r.m.s.d.

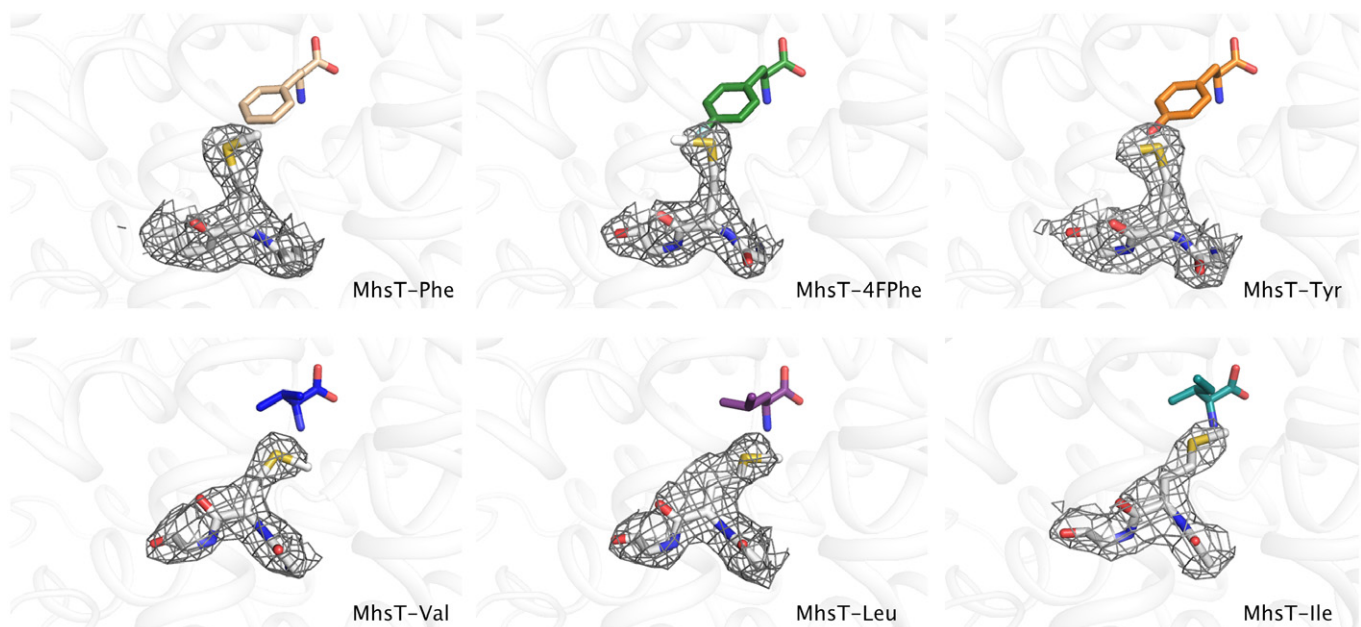

**Figure EV2.**  $2F_0-F_c$  electron density maps contoured at 1.0 r.m.s.d. for the unwound region of TM6 of MhsT in complex with L-Phe, L-4-Phe, L-Tyr, L-Val, L-Leu, and L-Ile.

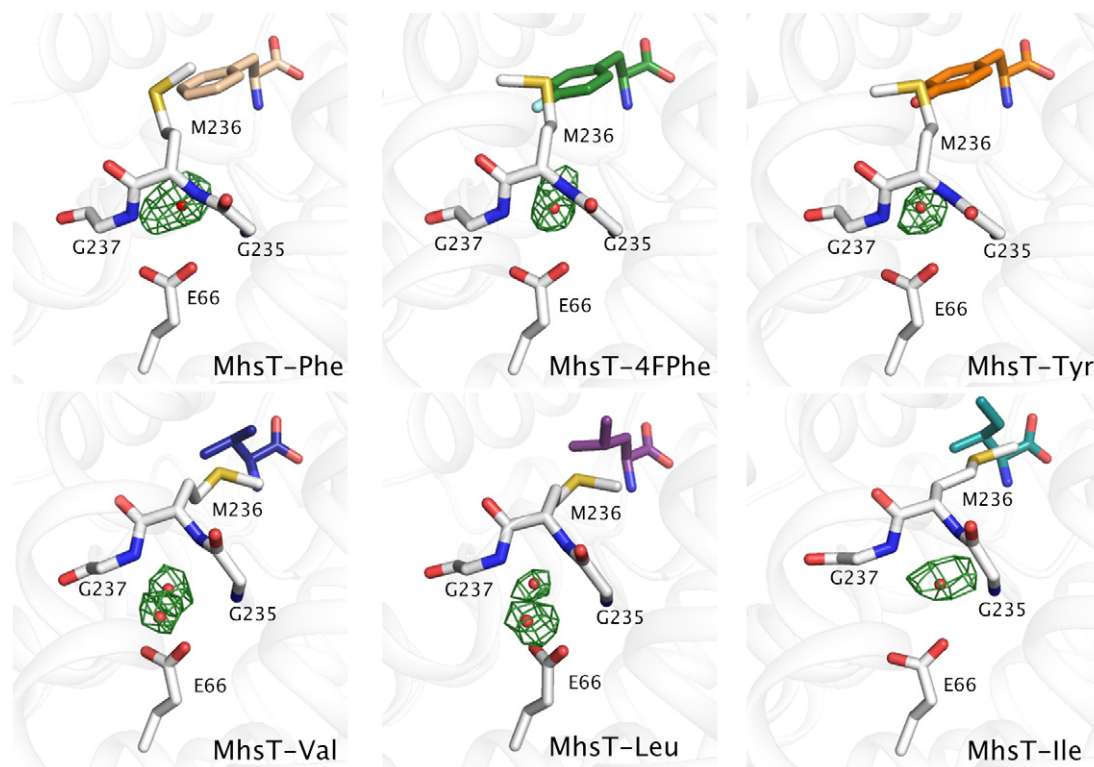

**Figure EV3.**  $F_o - F_c$  simulated annealing omit maps of the water molecules near the GMG loop contoured at  $\pm 3.0$  r.m.s.d. of MhsT in complex with L-Phe, L-4-F-Phe, L-Tyr, L-Val, L-Leu, and L-Ile.

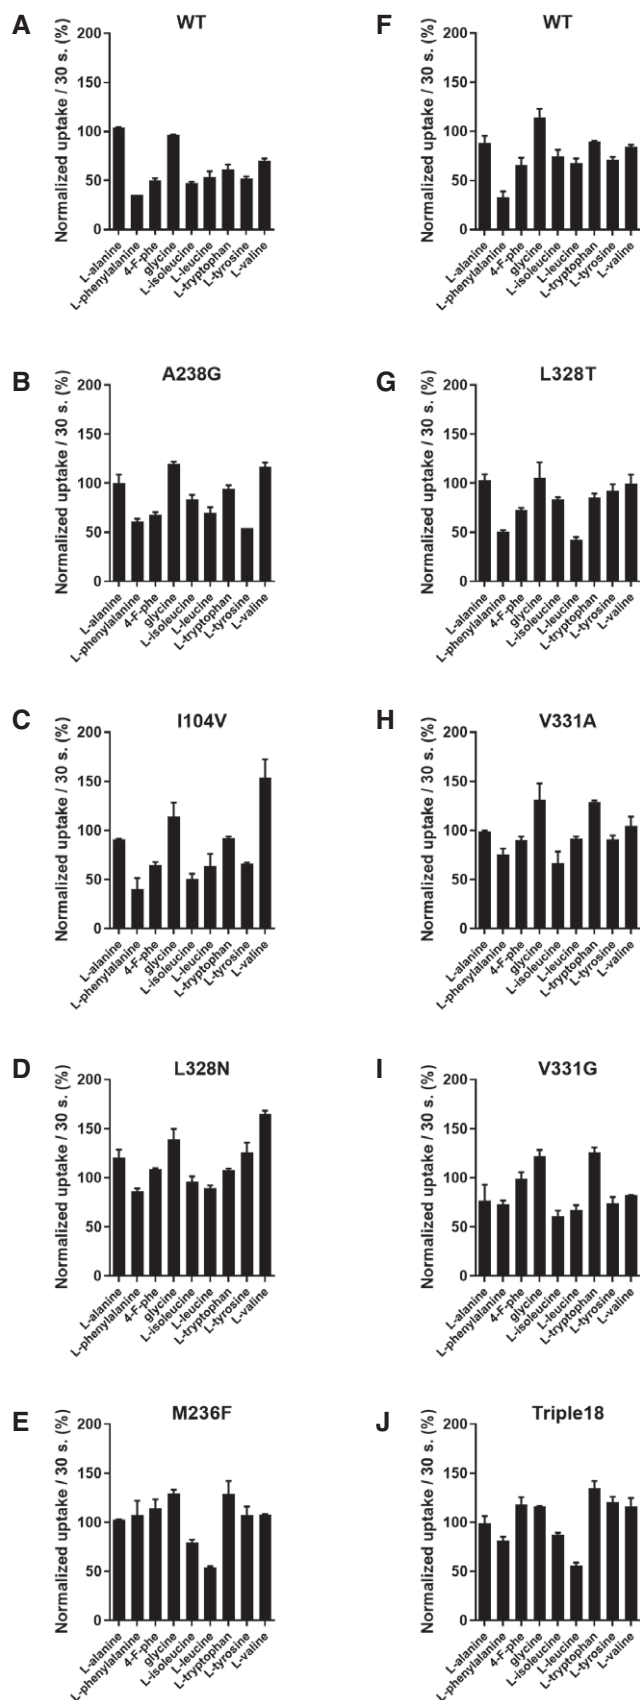

**Figure EV4. Competitive uptake assay of L-[<sup>3</sup>H]Leu by WT or mutated variants of MhsT in the presence or absence of selected amino acids.**

A–J MhsT-WT uptake of L-leucine is inhibited to various degree by all of the hydrophobic amino acids. The M236F mutant shows complete inability to compete L-leucine with hydrophobic amino acids, indicating impaired binding or transport. The triple18 variant harbors the following substitutions: L328T, M236F, and V331A. Uptake measurements were performed in *Escherichia coli* strain YG228 expressing the indicated variants. Data are the mean ± SEM of two independent experiments each performed as technical duplicates.

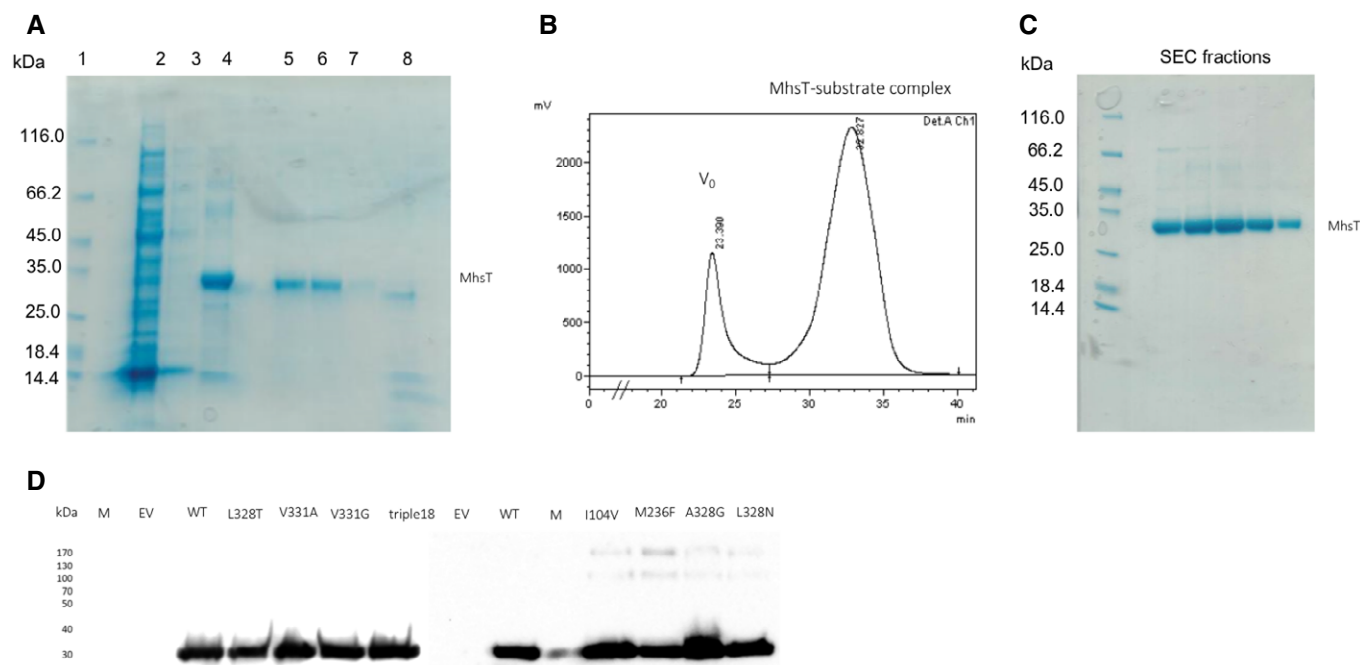

**Figure EV5. Purification of the MhsT-substrate complexes and expression of the MhsT mutants.**

- A SDS-PAGE of the  $\text{Ni}^{2+}$ -affinity chromatography and reverse  $\text{Ni}^{2+}$ -affinity chromatography of the MhsT-substrate complexes. Samples order: 1—Protein marker; 2, 3, 4—Fractions from  $\text{Ni}^{2+}$ -affinity chromatography (respectively: flow-through, wash, and elution in 250 mM imidazole buffer); 5, 6, 7, 8—Fractions from reverse  $\text{Ni}^{2+}$ -affinity chromatography (respectively: flow-through, wash (two lanes), and elution of the uncleaved protein and TEV protease in 250 mM imidazole buffer).
- B Size exclusion chromatogram (TSKgel G3000SW gel filtration column, flow rate = 0.5 ml/min).
- C SDS-PAGE of the SEC peak fractions.
- D An example of Western blot analysis of MhsT expression in cells. The immunological detection of the relative amount of MhsT-WT and selected MhsT mutants confirms comparable protein expression levels.

Source data are available online for this figure.
